# Supplementary material for: Highly efficient near-infrared solid solution phosphors with excellent thermal stability and tunable spectra for pc-LED light sources toward NIR spectroscopy applications
Source: Royal Society of Chemistry journal article supplement (doi:10.1039/d3cp03634k), 2023-01-01
Supplement: d3cp03634k1.pdf [file d3cp03634k1.pdf]

## Supplementary Information

### Highly efficient near-infrared solid solution phosphors with excellent thermal stability and tunable spectra for pc-LED light source toward NIR spectroscopy applications

Tianchun Lang<sup>a,\*</sup>, Qunyang Zhao<sup>a</sup>, Xiaolong Jing<sup>a,d</sup>, Gaoxuanyu Guan<sup>a</sup>, Shuangqiang Fang<sup>b,\*</sup>, Qinqing Qiang<sup>a</sup>, Lingling Peng<sup>a</sup>, Tao Han<sup>c</sup>, Alexey N. Yakovlev<sup>d</sup>, Bitao Liu<sup>a,\*</sup>

<sup>a</sup> College of Materials Science and Engineering, Chongqing University of Arts and Sciences, Chongqing, 402160, China

<sup>b</sup> College of Optical and Electronic Technology, China Jiliang University, Hangzhou 310018, China

<sup>c</sup> School of Metallurgy and Materials Engineering, Chongqing University of Science and Technology, Chongqing, 401331, China

<sup>d</sup> Institute of Chemical and Oil-Gas Technologies, T. F. Gorbachev Kuzbass State Technical University, Kemerovo, 650000, Russia

\* Corresponding author.

E-mail addresses: [leeltc@126.com](mailto:leeltc@126.com) (T. Lang), [fsq1025@163.com](mailto:fsq1025@163.com) (S. Fang), [liubitao007@163.com](mailto:liubitao007@163.com) (B. Liu)

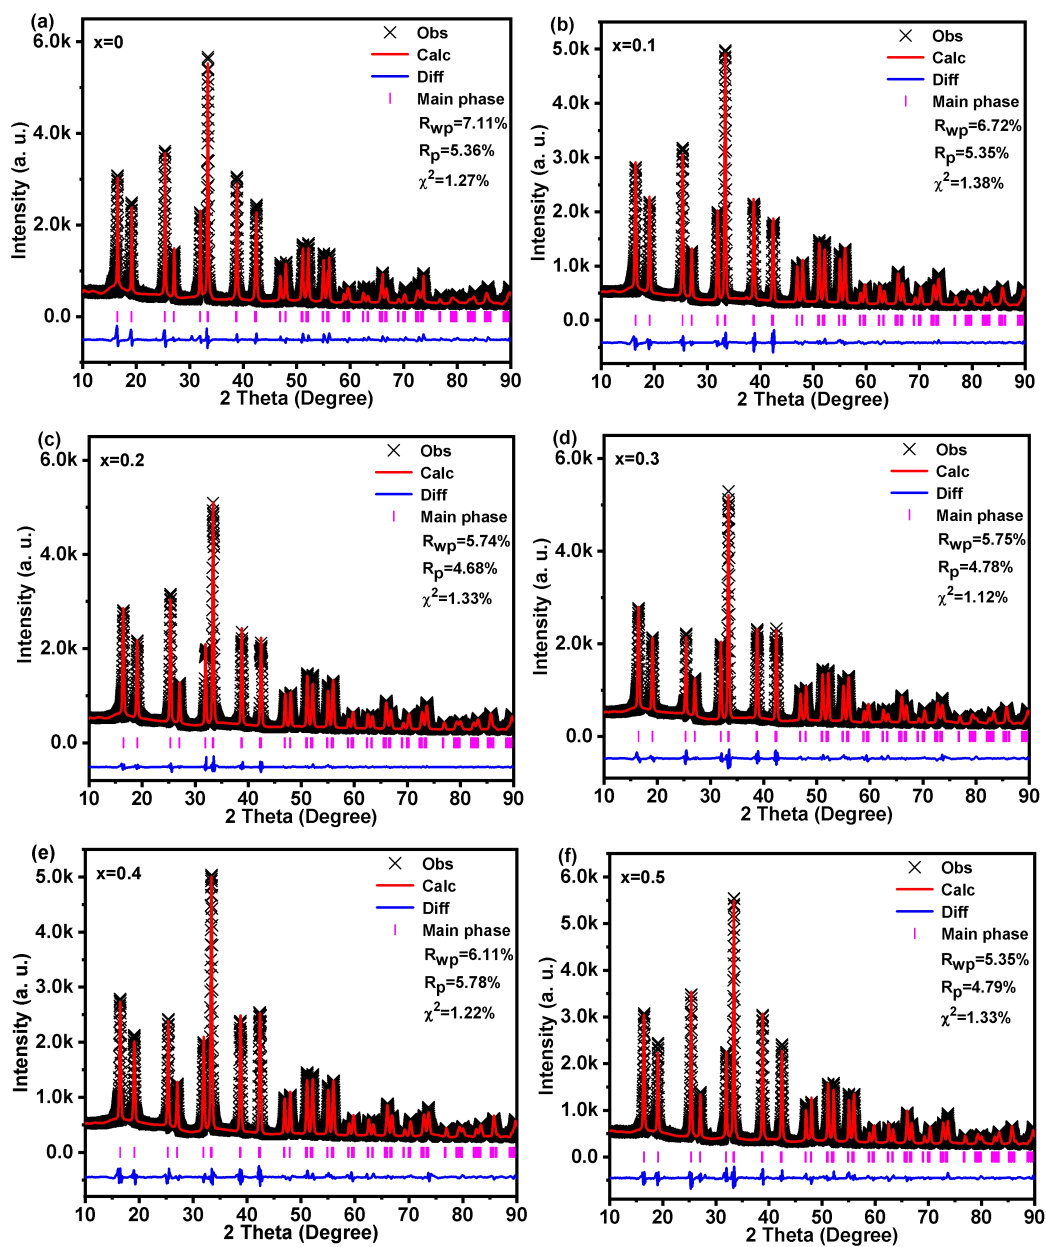

Fig.S1 Rietveld refinement of GLASB:Cr<sup>3+</sup> (x=0, 0.1, 0.2, 0.3, 0.4 and 0.5).

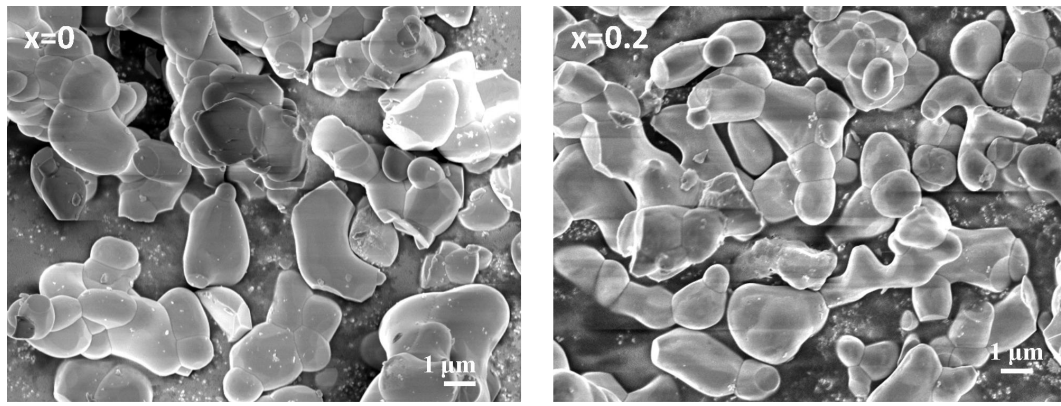

Fig. S2 SEM images of GLASB:Cr<sup>3+</sup> (left,  $x = 0$ ; and right,  $x = 0.2$ ) with  $\times 5$  kx magnifications.

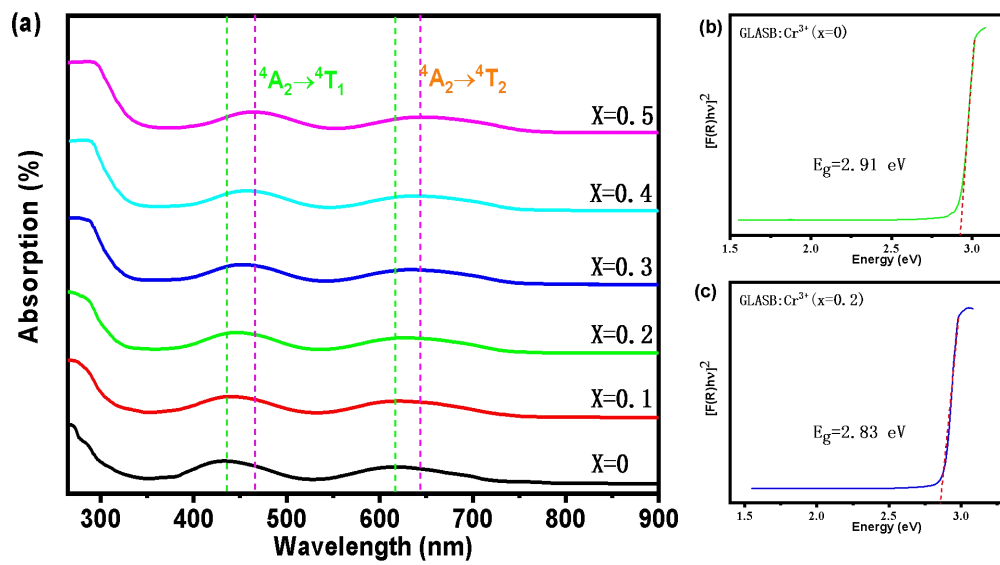

Fig. S3 (a) UV-vis-NIR absorption spectra of GLASB:Cr<sup>3+</sup> (x=0-0.5). (b, c) The fitting of the corresponding band gap energies of GLASB:Cr<sup>3+</sup> (x=0 and 0.2) phosphors.

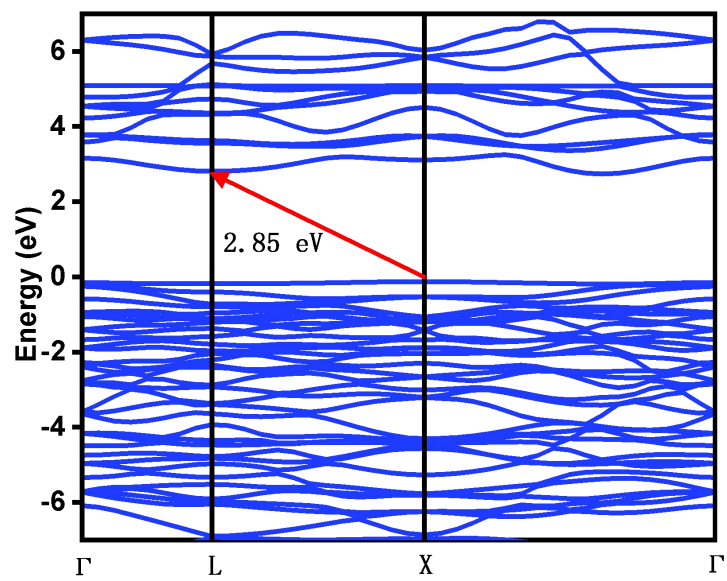

Fig. S4 Calculated electronic band structure

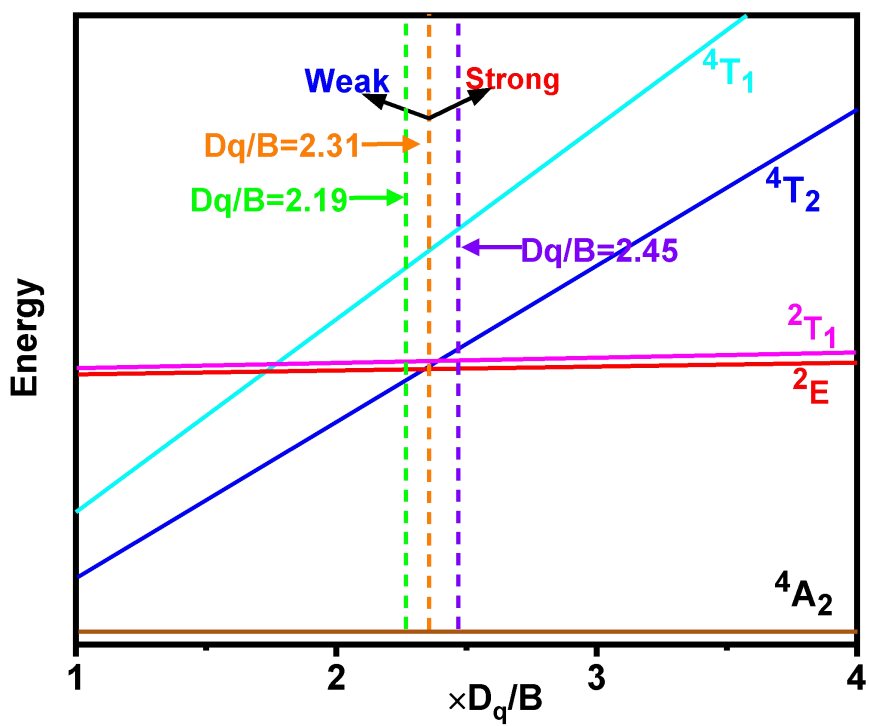

Fig. S5 Tanabe-Sugano ( $3d^3$ ) diagram.

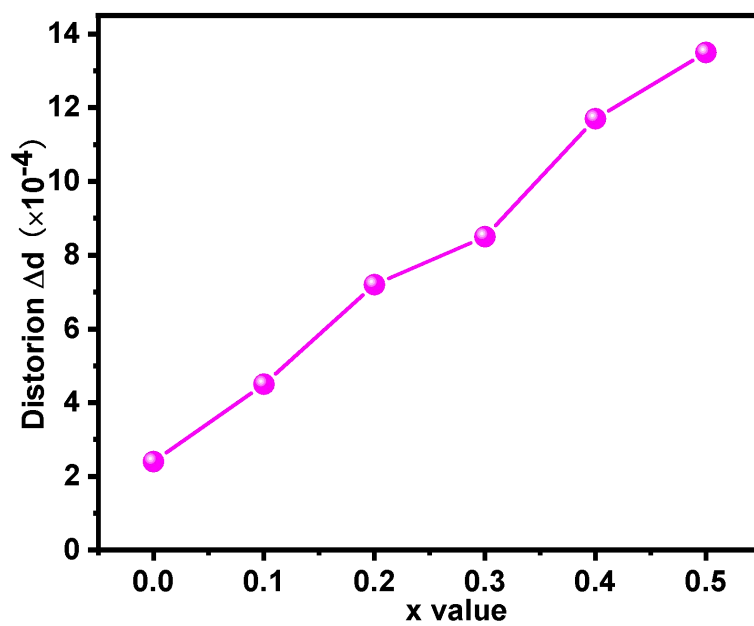

Fig. S6 The linear relationship between the octahedral distortion ( $\Delta d$ ) and dissolved x content

**Table S1.** Refined Crystallographic Parameters for GLASB:Cr<sup>3+</sup>.

| Parameters                    | x=0         | x=0.1  | x=0.2  | x=0.3  | x=0.4  | x=0.5  |
|-------------------------------|-------------|--------|--------|--------|--------|--------|
| Space group                   | Hexagonal   |        |        |        |        |        |
| $\alpha/\beta/\gamma$         | 90°/90°/120 |        |        |        |        |        |
| a/b/c (Å)                     | 7.229/      | 7.232/ | 7.249/ | 7.267/ | 7.315/ | 7.332/ |
|                               | 9.313/      | 9.324/ | 9.328/ | 9.351/ | 9.386/ | 9.392/ |
|                               | 16.187      | 16.209 | 16.222 | 16.243 | 16.302 | 16.336 |
| Cell volume (Å <sup>3</sup> ) | 1089        | 1091.1 | 1091.8 | 1093.9 | 1095.3 | 1095.9 |
| R <sub>wp</sub>               | 7.11%       | 6.72%  | 5.74%  | 5.75%  | 6.11%  | 5.35%  |
| R <sub>p</sub>                | 5.36%       | 5.35%  | 4.68%  | 4.78%  | 5.78%  | 4.79%  |
| $\chi^2$                      | 1.27%       | 1.38%  | 1.33%  | 1.12%  | 1.22%  | 1.33%  |

**Table S2.** Selected (Al, Sc, Cr)-O bond lengths (Å) of GLASB:Cr<sup>3+</sup>.

| bond lengths    | X=0        | X=0.2     |
|-----------------|------------|-----------|
| (Al, Sc, Cr)-O1 | 1.8672 (5) | 1.8678(2) |
| (Al, Sc, Cr)-O2 | 1.9012 (4) | 1.9115(3) |
| (Al, Sc, Cr)-O3 | 1.9081 (1) | 1.9085(1) |
| (Al, Sc, Cr)-O4 | 1.9080 (4) | 1.9083(3) |
| (Al, Sc, Cr)-O5 | 1.9009 (2) | 1.9112(4) |
| (Al, Sc, Cr)-O6 | 1.8688 (3) | 1.8791(5) |
| Average         | 1.8923     | 1.8978    |



**Table S3.** Performance parameters for GLASB:Cr<sup>3+</sup> (x=0-0.5).

| Compound | Peak | FWHM | $\Delta d (\times 10^{-4})$ | $\lambda_{\text{oct}}$ | $\sigma_{\text{oct}}^2$ |
|----------|------|------|-----------------------------|------------------------|-------------------------|
| x=0.0    | 747  | 128  | 2.31                        | 1.0235                 | 5.08                    |
| x=0.1    | 789  | 167  | 4.38                        | 1.0265                 | 5.17                    |
| x=0.2    | 806  | 196  | 7.08                        | 1.0338                 | 5.39                    |
| x=0.3    | 843  | 182  | 8.22                        | 1.0440                 | 5.51                    |
| x=0.4    | 858  | 179  | 11.57                       | 1.0537                 | 5.60                    |
| x=0.5    | 866  | 177  | 13.15                       | 1.0654                 | 5.76                    |

**Table S4.** Luminescent parameters of Cr<sup>3+</sup> in different host materials and photoelectric properties of the fabricated NIR pc-LED

| Phosphor                                                                            | $\lambda_{\text{max}}$ (nm) | FWHM (nm) | IQE (%) | TQ at 150 °C (%) | NIR output power/efficiency of pc-LED | Ref.             |
|-------------------------------------------------------------------------------------|-----------------------------|-----------|---------|------------------|---------------------------------------|------------------|
| GLASB:Cr <sup>3+</sup>                                                              | 806                         | 196       | 93.6    | 105.7            | 46 mW/37% @100 mA                     | <b>This work</b> |
| Ca <sub>3</sub> Sc <sub>2</sub> Si <sub>3</sub> O <sub>12</sub> :Cr <sup>3+</sup>   | 740                         | 140       | 91      | 100              | 650-1000                              | [1]              |
| Ca <sub>2</sub> LuHf <sub>2</sub> Al <sub>3</sub> O <sub>12</sub> :Cr <sup>3+</sup> | 785                         | 145       | -       | -                | 3.1 mW/14% @120 mA                    | [2]              |
| Ca <sub>3</sub> Ga <sub>2</sub> Ge <sub>3</sub> O <sub>12</sub> :Cr <sup>3+</sup>   | 803                         | 267       | -       | 90%              | 27.1 mW/16.3% @100 mA                 | [3]              |
| ScBO <sub>3</sub> :Cr <sup>3+</sup>                                                 | 800                         | 120       | 65      | 51               | 26 mW/7% @120 mA                      | [4]              |
| La <sub>3</sub> Ga <sub>5</sub> GeO <sub>14</sub> :Cr <sup>3+</sup>                 | 750                         | 330       | -       | -                | 18.2 mW/- @350 mA                     | [5]              |
| Ca <sub>2</sub> LuZr <sub>2</sub> Al <sub>3</sub> O <sub>12</sub> :Cr <sup>3+</sup> | 752                         | 117       | 69      | 60               | 2.44 mW/4.1% @120 mA                  | [6]              |
| NaInP <sub>2</sub> O <sub>7</sub> :Cr <sup>3+</sup>                                 | 856                         | 133       | 71.3    | 47               | 39.1 mW/10.9% @120 mA                 | [7]              |
| NaScSi <sub>2</sub> O <sub>6</sub> :Cr <sup>3+</sup>                                | 840                         | 140       | -       | -                | -                                     | [8]              |
| LiScP <sub>2</sub> O <sub>7</sub> :Cr <sup>3+</sup>                                 | 880                         | 170       | 38      | -                | 19 mW@100 mA                          | [9]              |
| InBO <sub>3</sub> :Cr <sup>3+</sup>                                                 | 820                         | 138       | 46      | -                | 37.50 mW@120 mA                       | [10]             |
| LiInP <sub>2</sub> O <sub>7</sub> :Cr <sup>3+</sup>                                 | 860                         | 165       | 20      | -                | 6.42 mW@100 mA                        | [11]             |
| NaScGe <sub>2</sub> O <sub>6</sub> :Cr <sup>3+</sup>                                | 895                         | 162       | 40.2    | -                | 12.07 mW@350 mA                       | [12]             |
| LiGaP <sub>2</sub> O <sub>7</sub> :Cr <sup>3+</sup>                                 | 846                         | 170       | 48      | -                | 28.10 mW@120 mA                       | [13]             |

Reference:

[1] Z. Jia, C. Yuan, Y. Liu, X.-J. Wang, P. Sun, L. Wang, H. Jiang, J. Jiang, *Light: Sci. Appl.* 2020, 9, 86.

[2] L. Zhang, D. Wang, Z. Hao, X. Zhang, G.-H. Pan, H. Wu, J. Zhang, *Adv. Opt. Mater.* 2019, 7, 1900185.

[3] T. C. Lang, M. S. Cai, S. Q. Fang, T. Han, S. S. He, Q. Wang, G. Ge, J. Wang, C. Z. Guo, L. L. Peng, S. X. Cao, B. T. Liu, V. Korepanov, A. Yakovlev and J. B. Qiu, *Adv. Opt. Mater.* 2022, 10, 2101633.

- [4] Q. Y. Shao, H. Ding, L. Q. Yao, J. F. Xu, C. Liang, J. Q. Jiang, Photoluminescence properties of a  $\text{ScBO}_3:\text{Cr}^{3+}$  phosphor and its applications for broadband near-infrared LEDs, *RSC Adv.* 2018, 8, 12035-12042.
- [5] V. Rajendran, M. H. Fang, G. N. De Guzman, T. Lesniewski, S. Mahlik, M. Grinberg, G. Leniec, S. M. Kaczmarek, Y. S. Lin, K. M. Lu, C. M. Lin, H. Chang, S. F. Hu, R. S. Liu, Super broadband near-infrared phosphors with high radiant flux as future light sources for spectroscopy applications, *ACS Energy Lett.* 2018, 3, 2679-2684.
- [6] L. L. Zhang, S. Zhang, Z. D. Hao, X. Zhang, G. H. Pan, Y. S. Luo, H. J. Wu, J. H. Zhang, A high efficiency broad-band near-infrared  $\text{Ca}_2\text{LuZr}_2\text{Al}_3\text{O}_{12}:\text{Cr}^{3+}$  garnet phosphor for blue LED chips, *J. Mater. Chem. C* 2018, 6, 4967-4976
- [7] Q. Wang, S. Wang, T. Tan, J. Wang, R. Pang, D. Li, H. Zhang, Efficient  $\text{Cr}^{3+}$ -activated  $\text{NaInP}_2\text{O}_7$  phosphor for broadband near-infrared LED applications. *Inorganic Chemistry Frontiers*, 2022, 9, 3692-3701.
- [8] Q. Shao, H. Ding, L. Yao, J. Xu, C. Liang, Z. Li, Y. Dong and J. Jiang, Broadband near-infrared light source derived from  $\text{Cr}^{3+}$ -doped phosphors and a blue LED chip, *Opt. Lett.*, 2018, 43, 5251-5254
- [9] L. Yao, Q. Shao, S. Han, C. Liang, J. He and J. Jiang, Enhancing near-infrared photoluminescence intensity and spectral properties in  $\text{Yb}^{3+}$  codoped  $\text{LiScP}_2\text{O}_7:\text{Cr}^{3+}$ , *Chem. Mater.*, 2020, 32, 2430-2439
- [10] Z. S. Sun, Q. X. Ning, W. Y. Zhou, J. B. Luo, P. C. Chen, L. Y. Zhou, Q. Pang and X. G. Zhang, Structural and spectroscopic investigation of an efficient and broadband NIR phosphor  $\text{InBO}_3:\text{Cr}^{3+}$  and its application in NIR pc-LEDs, *Ceram. Int.*, 2021, 47, 13598-13603
- [11] H. S. Zhang, J. Y. Zhong, X. L. Zhang, H. X. Yang, Z. F. Mu and W. R. Zhao, Achieving an ultra-broadband infrared emission through efficient energy transfer in  $\text{LiInP}_2\text{O}_7:\text{Cr}^{3+}, \text{Yb}^{3+}$  phosphor, *J. Alloys Compd.*, 2021, 894, 162386
- [12] X. F. Zhou, W. Y. Geng, J. Y. Li, Y. C. Wang, J. Y. Ding and Y. H. Wang, An Ultraviolet-Visible and Near-Infrared Responder Broadband NIR Phosphor and Its NIR Spectroscopy Application, *Adv. Opt. Mater.*, 2020, 8, 1902003

[13] C. X. Yuan, R. Y. Li, Y. F. Liu, L. L. Zhang, J. H. Zhang, G. Leniec, P. Sun, Z. H. Liu, Z. H. Luo, R. Dong and J. Jiang, Efficient and Broadband LiGaP<sub>2</sub>O<sub>7</sub>:Cr<sup>3+</sup> Phosphors for Smart Near-Infrared Light-Emitting Diodes, *Laser Photonics Rev.*, 2021, 2100227
